# Supplementary material
Source: PubMed Central journal article supplement (PMC8222170)
Supplement: NIHMS1673829-supplement-SUP.pdf [file NIHMS1673829-supplement-SUP.pdf]

**Supplementary Material For:**

**A Ketogenic Diet Differentially Affects Neuron And  
Astrocyte Transcription**

Scott J. Koppel<sup>1,2</sup>, Dong Pei<sup>3</sup>, Heather M. Wilkins<sup>1,4</sup>, Ian W. Weidling<sup>1,2</sup>, Xiaowan Wang<sup>1,4</sup>,  
Blaise W. Menta<sup>1,5</sup>, Judit Perez-Ortiz<sup>1,4</sup>, Anuradha Kalani<sup>1,4</sup>, Sharon Manley<sup>1,4</sup>, Lesya  
Novikova<sup>1,4</sup>, Devin C. Koestler<sup>3</sup>, Russell H. Swerdlow<sup>1,2,4,5</sup>

<sup>1</sup>University of Kansas Alzheimer's Disease Center, Kansas City, KS, USA and the Departments  
of <sup>2</sup>Molecular and Integrative Physiology, <sup>3</sup>Biostatistics and Data Science, <sup>4</sup>Neurology, and  
<sup>5</sup>Biochemistry and Molecular Biology, University of Kansas Medical Center, Kansas City, KS,  
USA

**Table S1. From the neuron-enriched RNA samples, the thirty genes with the lowest uncorrected p-values.** A comparison between KD and Chow-fed mice neuron-enriched gene expression levels revealed the lowest uncorrected p-values for these genes. Black and red fonts indicate activated and suppressed genes respectively.

| Gene                 | P-Value                |
|----------------------|------------------------|
| Ndufb5               | 6.0 x 10 <sup>-6</sup> |
| Rnf115               | 1.39x10 <sup>-5</sup>  |
| 1700020I14Rik        | 0.000147230            |
| Ctxn1                | 0.000168726            |
| Ubac2                | 0.000176338            |
| Gfra4                | 0.000210059            |
| B4galt3              | 0.000224228            |
| Rpusd1               | 0.000227457            |
| AK155692             | 0.000238010            |
| Rnf14                | 0.000246002            |
| Olf1431              | 0.000275828            |
| Tst                  | 0.000282924            |
| <b>Olf385</b>        | <b>0.000297638</b>     |
| 2700029M09Rik        | 0.000331136            |
| <b>4930413M19Rik</b> | <b>0.000339662</b>     |
| Slc16a4              | 0.000379751            |
| Ebag9                | 0.000383796            |
| Phpt1                | 0.000536413            |
| AK048085             | 0.000560823            |
| Mettl15              | 0.000581042            |
| Gm13769              | 0.000689679            |
| Pyroxd1              | 0.000693242            |
| Lars2                | 0.000723554            |
| Hist1h4m             | 0.000763382            |
| Atg5                 | 0.000779491            |
| <b>Lipc</b>          | <b>0.000836519</b>     |
| <b>Dupd1</b>         | <b>0.000904344</b>     |
| Rps21                | 0.000965166            |
| <b>Nmnat1</b>        | <b>0.001008391</b>     |
| Mt2                  | 0.00105926             |

**Table S2. From the astrocyte-enriched RNA samples, the thirty genes with the lowest uncorrected p-values.** A comparison between KD and Chow-fed mice astrocyte-enriched gene expression levels revealed the lowest uncorrected p-values for these genes. Black and red fonts indicate activated and suppressed genes respectively.

| <b>Gene</b>     | <b>P-Value</b>     |
|-----------------|--------------------|
| Olfr1173        | 6.83E-05           |
| <b>Gm9833</b>   | <b>0.000609743</b> |
| Olfr1281        | 0.00064395         |
| Mup10           | 0.00078149         |
| Gm4340          | 0.001066191        |
| AK004434        | 0.00149721         |
| BC060616        | 0.001754201        |
| Olfr612         | 0.00189627         |
| Azgp1           | 0.001945021        |
| AK161373        | 0.001956496        |
| Serpina10       | 0.002214632        |
| <b>Pcdha4</b>   | <b>0.002240494</b> |
| Cabp4           | 0.002257912        |
| Cilp            | 0.002389504        |
| Vmn1r68         | 0.00257838         |
| Olfr1447        | 0.00270419         |
| Mfsd6l          | 0.003151691        |
| Oca2            | 0.003205539        |
| Srpx2           | 0.003285461        |
| Olfr1079        | 0.003368619        |
| Ntf3            | 0.003388646        |
| Hsf5            | 0.003490311        |
| Olfr1459        | 0.003701645        |
| Olfr685         | 0.003953845        |
| Vav1            | 0.004070868        |
| Fkbp14          | 0.0041769          |
| Gsdmc           | 0.004207473        |
| <b>AK157947</b> | <b>0.004295523</b> |
| Lao1            | 0.004322993        |
| Casr            | 0.004376261        |

**Table S3. KEGG molecular pathway changes.**

| <b>Neurons: Activated<br/>Pathway (q-value)</b>       | <b>Neurons: Suppressed<br/>Pathway (q-value)</b> | <b>Astrocytes: Activated<br/>Pathway (q-value)</b> | <b>Astrocytes: Suppressed<br/>Pathway (q-value)</b>  |
|-------------------------------------------------------|--------------------------------------------------|----------------------------------------------------|------------------------------------------------------|
| Protein processing in endoplasmic reticulum (0.00066) |                                                  | Hematopoietic cell lineage (0.00783)               | Axon guidance (0.00003)                              |
| Insulin signaling pathway (0.00122)                   |                                                  | Cytokine-cytokine receptor interaction (0.00960)   | Glutamatergic synapse (0.000031)                     |
| Oxidative Phosphorylation (0.00122)                   |                                                  | Retinol metabolism (0.03533)                       | Circadian entrainment (0.000122)                     |
| Adrenergic signaling in cardiomyocytes (0.00122)      |                                                  | Steroid hormone biosynthesis (0.04085)             | Spliceosome (0.000151)                               |
| Dopaminergic synapse (0.00122)                        |                                                  | Complement and coagulation cascades (0.04085)      | Long-term potentiation (0.000354)                    |
| cAMP signaling pathway (0.00122)                      |                                                  |                                                    | Phosphatidylinositol signaling system (0.000420)     |
| Autophagy-animal (0.00122)                            |                                                  |                                                    | GABAergic synapse (0.000420)                         |
| MAPK signaling pathway (0.00122)                      |                                                  |                                                    | Oxytocin signaling pathway (0.000420)                |
| ErbB signaling pathway (0.00122)                      |                                                  |                                                    | Retrograde endocannabinoid signaling (0.000497)      |
| Oocyte meiosis (0.00125)                              |                                                  |                                                    | Insulin secretion (0.000591)                         |
| Ras signaling pathway (0.00156)                       |                                                  |                                                    | Dopaminergic synapse (0.000591)                      |
| Ribosome (0.00167)                                    |                                                  |                                                    | GnRH signaling pathway (0.000844)                    |
| Long-term potentiation (0.00167)                      |                                                  |                                                    | Cholinergic synapse (0.000844)                       |
| Retrograde endocannabinoid signaling (0.00175)        |                                                  |                                                    | mRNA surveillance pathway (0.000844)                 |
| Oxytocin signaling pathway (0.00184)                  |                                                  |                                                    | Protein processing in endoplasmic reticulum (.00138) |
| Glutamatergic synapse (0.00195)                       |                                                  |                                                    | ErbB signaling pathway (0.00314)                     |
| GABAergic synapse (0.00195)                           |                                                  |                                                    | Thyroid hormone signaling pathway (0.00319)          |
| Endocytosis (0.00227)                                 |                                                  |                                                    | Autophagy – animal (0.00319)                         |
| Neurotrophin signaling pathway (0.00227)              |                                                  |                                                    | Adrenergic signaling in cardiomyocytes (0.00411)     |
| Circadian entrainment (0.00235)                       |                                                  |                                                    | Gap junction (0.00533)                               |
| Axon guidance (0.00235)                               |                                                  |                                                    | MAPK signaling pathway (0.00533)                     |

|                                                           |  |  |                                                                     |
|-----------------------------------------------------------|--|--|---------------------------------------------------------------------|
| Estrogen signaling pathway (0.00272)                      |  |  | Endocytosis (0.00533)                                               |
| Gap junction (0.00280)                                    |  |  | cAMP signaling pathway (0.00576)                                    |
| Rap1 signaling pathway (0.00286)                          |  |  | Inositol phosphate metabolism (0.00578)                             |
| Apelin signaling pathway (0.00405)                        |  |  | RNA transport (0.00578)                                             |
| GnRH signaling pathway (0.00405)                          |  |  | Insulin signaling pathway (0.00863)                                 |
| Regulation of actin cytoskeleton (0.00405)                |  |  | Ubiquitin mediated proteolysis (0.00863)                            |
| Cholinergic synapse (0.00418)                             |  |  | Endocrine and other factor-regulated calcium reabsorption (0.00863) |
| Thyroid hormone signaling pathway (0.00529)               |  |  | Calcium signaling pathway (0.00863)                                 |
| Longevity regulating pathway – multiple species (0.00541) |  |  | Neurotrophin signaling pathway (0.00880)                            |
| Phospholipase D signaling pathway (0.00541)               |  |  | Phospholipase D signaling pathway (0.0103)                          |
| Insulin secretion (0.00541)                               |  |  | Aldosterone synthesis and secretion (0.0103)                        |
| mTOR signaling pathway (0.00564)                          |  |  | Ribosome biogenesis in eukaryotes (0.0103)                          |
| cGMP-PKG signaling pathway (0.00620)                      |  |  | Progesterone-mediated oocyte maturation (0.0103)                    |
| Cardiac muscle contraction (0.0063)                       |  |  | Focal adhesion (0.0108)                                             |
| Longevity regulating pathway (0.00781)                    |  |  | RNA degradation (0.0116)                                            |
| Mitophagy – animal (0.00786)                              |  |  | Synaptic vesicle cycle (0.0126)                                     |
| Gastric acid secretion (.00853)                           |  |  | Long-term depression (0.0141)                                       |
| Progesterone-mediated oocyte maturation (0.00902)         |  |  | cGMP-PKG signaling pathway (0.0188)                                 |
| Fc gamma R-mediated phagocytosis (0.00980)                |  |  | VEGF signaling pathway (0.0191)                                     |
| Synaptic vesicle cycle (0.01014)                          |  |  | Aminoacyl-tRNA biosynthesis (0.0207)                                |
| Tight junction (0.01023)                                  |  |  | Lysine degradation (0.0244)                                         |
| EGFR tyrosine kinase inhibitor resistance (0.01107)       |  |  | Endocrine resistance (0.0245)                                       |
| Glucagon signaling pathway (0.01146)                      |  |  | Longevity regulating pathway (0.0253)                               |
| HIF-1 signaling pathway (0.01255)                         |  |  | Oocyte meiosis (0.0286)                                             |

|                                                                     |  |  |                                                    |
|---------------------------------------------------------------------|--|--|----------------------------------------------------|
| Sphingolipid signaling pathway (0.01255)                            |  |  | Vasopressin-regulated water reabsorption (0.0291)  |
| Adherens junction (0.01322)                                         |  |  | Sphingolipid signaling pathway (0.0295)            |
| Aldosterone synthesis and secretion (0.01342)                       |  |  | Cardiac muscle contraction (0.0365)                |
| Phosphatidylinositol signaling system (0.01608)                     |  |  | Tight junction (0.0365)                            |
| Endocrine resistance (0.01652)                                      |  |  | Ras signaling pathway (0.0377)                     |
| Ubiquitin mediated proteolysis (0.01652)                            |  |  | Aldosterone-regulated sodium reabsorption (0.0437) |
| Salivary secretion (0.01705)                                        |  |  | Apelin signaling pathway (0.0505)                  |
| Focal adhesion (0.01706)                                            |  |  | mTOR signaling pathway (0.0519)                    |
| Endocrine and other factor-regulated calcium reabsorption (0.01706) |  |  | Mannose type O-glycan biosynthesis (0.0546)        |
| Melanogenesis (0.01811)                                             |  |  | Rap1 signaling pathway (0.0550)                    |
| Carbon metabolism (0.01901)                                         |  |  | Estrogen signaling pathway (0.0585)                |
| Vasopressin-regulated water reabsorption (0.01957)                  |  |  | Circadian rhythm (0.0621)                          |
| AMPK signaling pathway (0.02239)                                    |  |  | Gastric acid secretion (0.0635)                    |
| Hippo signaling pathway (0.02239)                                   |  |  | EGFR tyrosine kinase inhibitor resistance (0.0711) |
| Lysosome (0.02428)                                                  |  |  | Glucagon signaling pathway (0.0725)                |
| FoxO signaling pathway (0.03066)                                    |  |  | Autophagy – other (0.0801)                         |
| Spliceosome (0.03303)                                               |  |  | Glycerophospholipid metabolism (0.0864)            |
| Calcium signaling pathway (0.03987)                                 |  |  | Other types of O-glycan biosynthesis (0.0864)      |
| Wnt signaling pathway (0.04063)                                     |  |  | Serotonergic synapse (0.0864)                      |
| Fatty acid metabolism (0.04197)                                     |  |  | Fc gamma R-mediated phagocytosis (0.0966)          |
| Chemokine signaling pathway (0.04309)                               |  |  | HIF-1 signaling pathway (0.0967)                   |
| Aldosterone-regulated sodium resorption (0.04319)                   |  |  | Adherens junction (0.0967)                         |
| Renin secretion (0.04605)                                           |  |  |                                                    |
| Regulation of lipolysis in adipocytes (.04667)                      |  |  |                                                    |
| Apoptosis (0.04692)                                                 |  |  |                                                    |

|                                                                      |  |  |  |
|----------------------------------------------------------------------|--|--|--|
| Various types of N-glycan biosynthesis (.05137)                      |  |  |  |
| Prolactin signaling pathway (0.05196)                                |  |  |  |
| Signaling pathways regulating pluripotency of stem cells (.05221)    |  |  |  |
| Thyroid hormone synthesis (.05381)                                   |  |  |  |
| Inflammatory mediator regulation of TRP channels (0.05805)           |  |  |  |
| Long-term depression (0.05805)                                       |  |  |  |
| Collecting duct acid secretion (0.06277)                             |  |  |  |
| Pancreatic secretion (0.06277)                                       |  |  |  |
| Mineral absorption (0.06920)                                         |  |  |  |
| Platelet activation (0.07028)                                        |  |  |  |
| T cell receptor signaling pathway (0.07028)                          |  |  |  |
| Cell cycle (0.07140)                                                 |  |  |  |
| Circadian rhythm (0.07768)                                           |  |  |  |
| VEGF signaling pathway (0.07988)                                     |  |  |  |
| SNARE interactions in vesicular transport (.07988)                   |  |  |  |
| Leukocyte transendothelial migration (0.08187)                       |  |  |  |
| Fc epsilon RI signaling pathway (0.08296)                            |  |  |  |
| N-glycan biosynthesis (0.08296)                                      |  |  |  |
| PI3K-Akt signaling pathway (0.084185)                                |  |  |  |
| Adipocytokine signaling pathway (0.08419)                            |  |  |  |
| B cell receptor signaling pathway (0.08741)                          |  |  |  |
| Serotonergic synapse (0.08997)                                       |  |  |  |
| Inositol phosphate metabolism (0.09228)                              |  |  |  |
| Glycosphingolipid biosynthesis – lacto and neolacto series (0.09572) |  |  |  |
| RNA transport (0.0967)                                               |  |  |  |
| Cellular senescence (0.0967)                                         |  |  |  |

**Table S4. KEGG pathology analysis. Black font=activated; red font=suppressed.**

| <b>Implicated in Neurons</b><br><i>Pathology or Disease (q-value)</i> | <b>Implicated in Astrocytes</b><br><i>Pathology or Disease (q-value)</i> |
|-----------------------------------------------------------------------|--------------------------------------------------------------------------|
| Alzheimer's disease (0.00066)                                         | Morphine addiction (0.00309)                                             |
| Parkinson's disease (0.00167)                                         | Choline metabolism in cancer (0.00309)                                   |
| Huntington's disease (0.00202)                                        | Type II diabetes mellitus (0.00319)                                      |
| Renal cell carcinoma (0.00216)                                        | Nicotine addiction (0.0108)                                              |
| Non-alcoholic fatty liver disease (0.00272)                           | Amphetamine addiction (0.0116)                                           |
| Proteoglycans in cancer (0.00405)                                     | Bacterial invasion of epithelial cells (0.0149)                          |
| Alcoholism (0.00472)                                                  | Central carbon metabolism in cancer (0.0195)                             |
| Morphine addiction (0.00602)                                          | Renal cell carcinoma (0.0243)                                            |
| Amphetamine addiction (0.00970)                                       | Staphylococcus aureus infection (0.0340)                                 |
| Bacterial invasion of epithelial cells (0.0108)                       | Glioma (0.0551)                                                          |
| Fluid shear stress and atherosclerosis (0.0115)                       | Dilated cardiomyopathy (0.0585)                                          |
| Prostate cancer (0.0114)                                              | Endometrial cancer (0.0635)                                              |
| Endometrial cancer (0.0161)                                           | MicroRNAs in cancer (0.0704)                                             |
| Colorectal cancer (0.0170)                                            | Proteoglycans in cancer (0.0760)                                         |
| Type II diabetes mellitus (0.0171)                                    | Insulin resistance (0.0888)                                              |
| Choline metabolism in cancer (0.0204)                                 |                                                                          |
| MicroRNAs in cancer (0.0213)                                          |                                                                          |
| Glioma (0.0250)                                                       |                                                                          |
| Insulin resistance (0.0250)                                           |                                                                          |
| Chagas disease (0.0350)                                               |                                                                          |
| Central carbon metabolism in cancer (0.0407)                          |                                                                          |
| Pancreatic cancer (0.0588)                                            |                                                                          |
| Chronic myeloid leukemia (0.0613)                                     |                                                                          |
| Salmonella infection (0.0696)                                         |                                                                          |
| Prion disease (0.0714)                                                |                                                                          |
| Tuberculosis (0.0734)                                                 |                                                                          |
| Dilated cardiomyopathy (0.0734)                                       |                                                                          |
| HTLV-I infection (0.0842)                                             |                                                                          |
| Amyotrophic lateral sclerosis (0.0983)                                |                                                                          |
| Nicotine addiction (0.0983)                                           |                                                                          |



**Table S5. IPA disease states.** Gene name with associated p-value and z-score displayed in parenthesis and brackets respectively. Disease states predicted to be at decreased risk by IPA software are marked in red.

| <b>Implicated in Neurons (p-value)[z-score]</b>                | <b>Implicated in Astrocytes (p-value)[z-score]</b>       |
|----------------------------------------------------------------|----------------------------------------------------------|
| Abnormality of cerebral cortex (0.0000035) [-1.172]            | Abnormal morphology of epithalamus (0.00121)             |
| Abnormal morphology of cerebral cortex (0.00000861)            | Abnormal morphology of habenula (0.00747)                |
| Abnormal morphology of hippocampus layer (0.0000205)           | Wallerian degeneration (0.0158)                          |
| Abnormal morphology of hippocampus (0.0000511)                 | Abnormal morphology of inferior olivary nucleus (0.0232) |
| Abnormal morphology of corpus callosum (0.00015)               | Loss of GABAergic neurons (0.0337)                       |
| Huntington Disease (0.000167)                                  | Cell death of pyramidal neurons (0.0337)                 |
| Disorder of basal ganglia (0.000212)                           | Edema of brain (0.0376)                                  |
| Dyskinesia (0.000265)                                          | Lack of olfactory bulb (0.0456)                          |
| Abnormal morphology of brain (0.000608)                        | Brain lesion (0.0476) [1.745]                            |
| Abnormal morphology of stratum pyramidale (0.00074)            |                                                          |
| Neurodegeneration of cerebral cortex (0.000813) [-1.765]       |                                                          |
| Abnormal morphology of central nervous system (0.000871)       |                                                          |
| Movement Disorders (0.00119) [-1]                              |                                                          |
| Abnormal morphology of pyramidal neurons (0.0013)              |                                                          |
| Abnormal function of nervous system (0.00216)                  |                                                          |
| Agenesis of corpus callosum (0.00237)                          |                                                          |
| Hypoplasia of forebrain (0.00267)                              |                                                          |
| Neurodegeneration of central nervous system (0.00283) [-3.183] |                                                          |
| Neuroinflammation of brain (0.00339) [-1.192]                  |                                                          |
| Hypoplasia of brain (0.00381) [-2.919]                         |                                                          |
| Abnormal morphology of nervous system (0.00388)                |                                                          |
| Degeneration of central nervous system (0.00421) [-3.316]      |                                                          |
| Neurodegeneration of brain (0.00434) [-3.039]                  |                                                          |
| Neuropathy of brain (0.00439)                                  |                                                          |
| Abnormal morphology of telencephalon (0.00529)                 |                                                          |
| Congenital malformation of brain (0.00542) [-3.08]             |                                                          |
| Damage of hippocampus (0.00557) [1.406]                        |                                                          |
| Abnormal morphology of Purkinje cells (0.00632)                |                                                          |
| Hypoplasia of telencephalon (0.00701)                          |                                                          |
| Degeneration of brain (0.00704) [-3.029]                       |                                                          |
| Abnormal morphology of cerebral ventricles (0.00903)           |                                                          |
| Neurodegeneration of thalamus (0.0101)                         |                                                          |
| Abnormal morphology of cerebellar cortex (0.0102)              |                                                          |
| Degeneration of postsynaptic terminals (0.0112)                |                                                          |
| Edema of nervous tissue (0.0112)                               |                                                          |
| Abnormal morphology of dorsal striatum (0.0112)                |                                                          |
| Damage of CA1 neuron (0.0112)                                  |                                                          |
| Apoptosis of CA1 neuron (0.0112)                               |                                                          |
| Abnormal morphology of forebrain (0.0128)                      |                                                          |
| Abnormal morphology of oligodendrocytes (0.016)                |                                                          |
| Abnormal morphology of hippocampal commissure (0.0161)         |                                                          |

|                                                                   |  |
|-------------------------------------------------------------------|--|
| Abnormal morphology of Purkinje's layer of cerebellum (0.0178)    |  |
| Enlargement of axons (0.0226)                                     |  |
| Neuroinflammation (0.0237) [-0.162]                               |  |
| Abnormal morphology of white matter (0.0237)                      |  |
| Neurodegeneration of hippocampus (0.0254) [-0.19]                 |  |
| Astrocytosis (0.0269) [-0.437]                                    |  |
| Abnormal morphology of neuroglia (0.0307)                         |  |
| Apoptosis of cerebral cortex cells (0.0313) [-0.749]              |  |
| Abnormal morphology of disorganized dorsal root ganglion (0.0314) |  |
| Damage of dopaminergic neurons (0.0314)                           |  |
| Infection of neurons (0.0314)                                     |  |
| Neurodegeneration (0.0365) [-3.442]                               |  |
| Damage of cerebral cortex (0.0402) [1.085]                        |  |
| Abnormal morphology of hippocampal CA1 region (0.0412)            |  |
| Apoptosis of hippocampal cells (0.0438) [-0.124]                  |  |
| Damage of pyramidal neurons (0.0443)                              |  |
| Lack of hippocampal commissure (0.0443)                           |  |
| Brain atrophy (0.047) [-1.746]                                    |  |

## Supplementary Figure Legends

**Figure S1. Overall cell enrichment procedure.**

**Figure S2. Low expression of microglia, oligodendrocyte, and endothelium-specific gene**

**transcripts.** A) Low levels of *Itgam*, *Aif1*, *Ptpnc1*, and *Cxcr3* indicate limited microglia

contamination. B) Low levels of *Olig1*, *Olig2*, *Olig3*, and *Sox10* indicate limited oligodendrocyte

contamination. C) Low levels of *Tek*, *Vcam1*, *Pecam1*, and *Vwf* indicate limited endothelial cell

contamination. N = 12, 11 for neuron and astrocyte samples respectively.

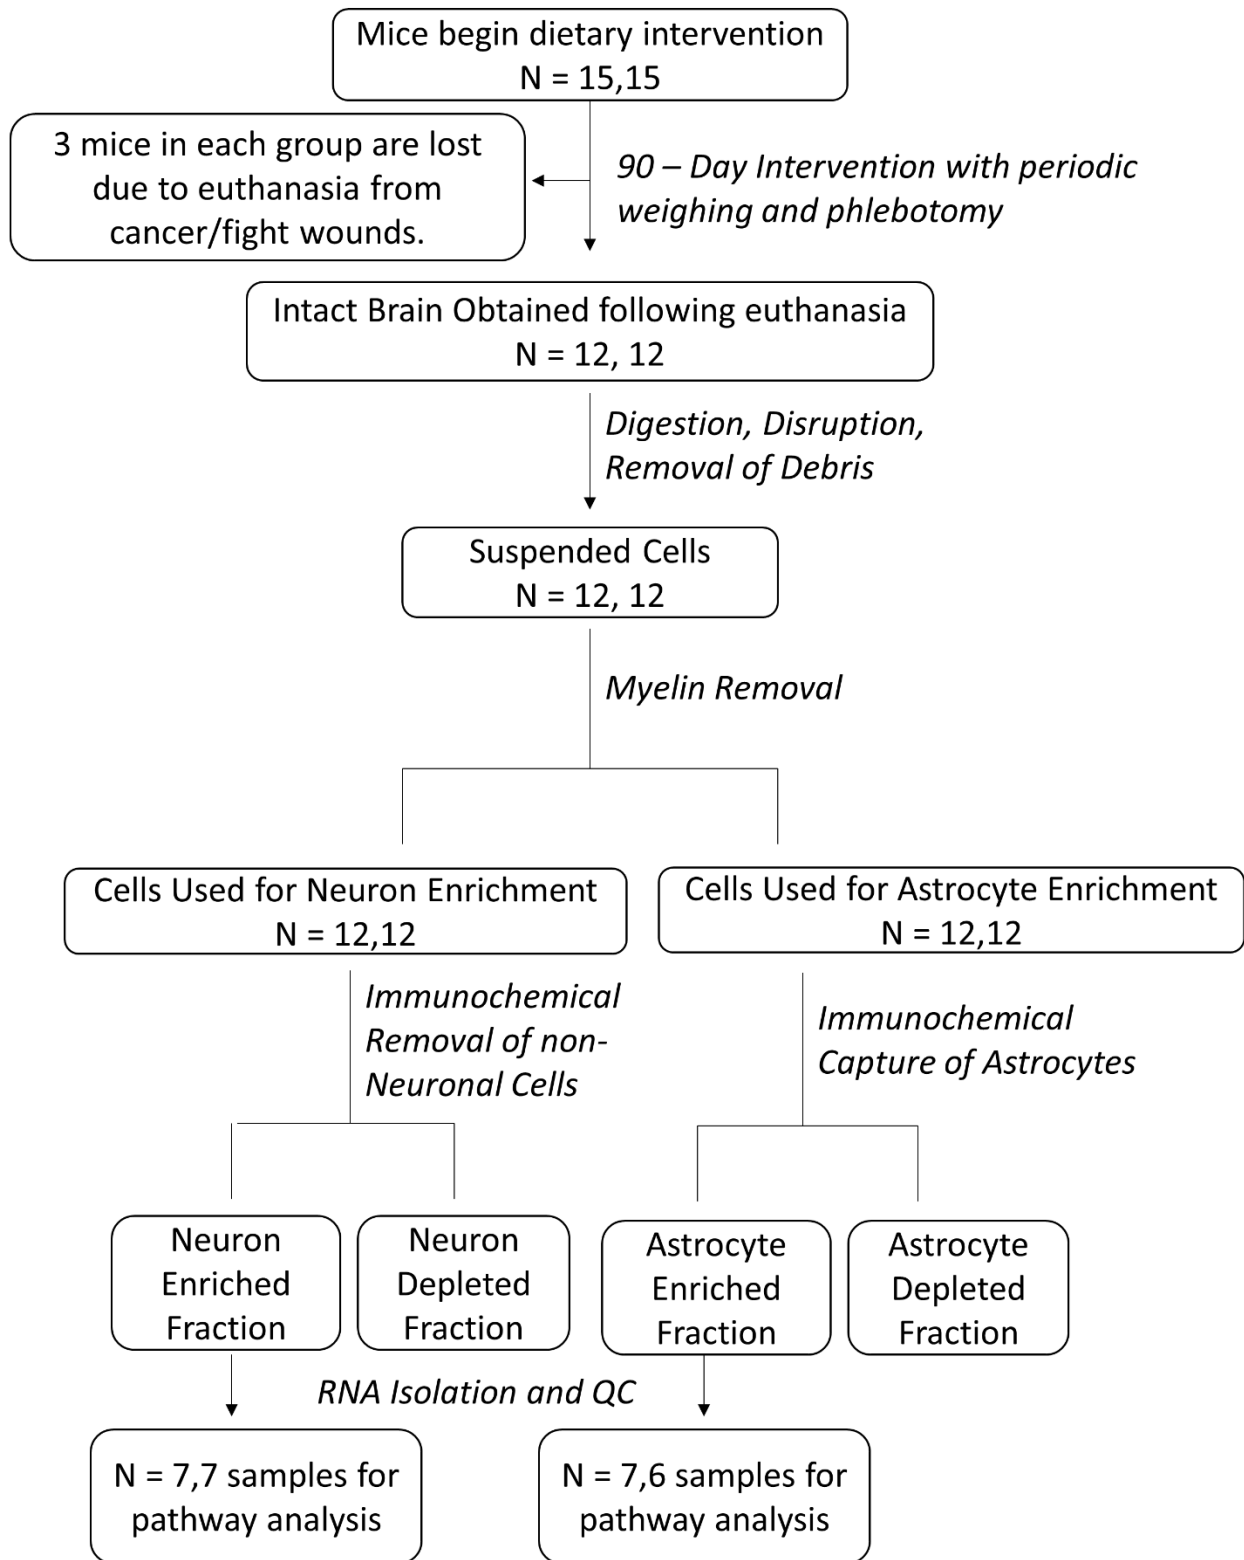

**Figure S1**

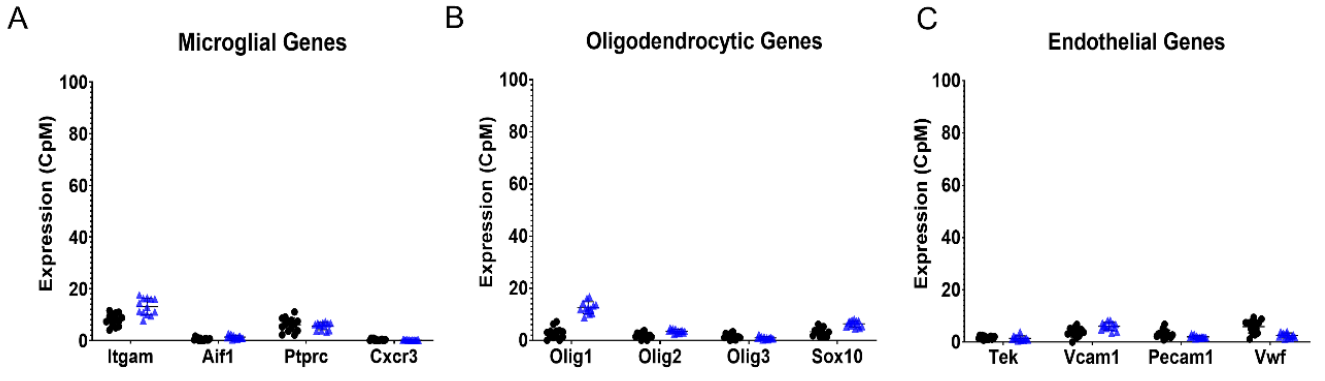

Figure S2
